# Supplementary material for: MDMA-assisted therapy for severe PTSD: a randomized, double-blind, placebo-controlled phase 3 study
Source: Springer Nature journal article supplement (doi:10.1038/s41591-021-01336-3), 2021-05-10
Supplement: 41591_2021_1336_MOESM1_ESM.pdf [file 41591_2021_1336_MOESM1_ESM.pdf]

---

**Supplementary information**

---

**MDMA-assisted therapy for severe PTSD: a randomized, double-blind, placebo-controlled phase 3 study**

---

In the format provided by the authors and unedited

## SUPPLEMENTARY DATA TABLES

**Supplementary Data Table 1. Missing Data from mITT Set Based on Reasons for Post-Randomization Withdrawal**

| Post-randomization Events                                                           | Available Data Post-Withdrawal                                | Treatment Assignment                                                                        | Summary of Missing Data and Inclusion in <i>de jure</i> Estimand by Visit                                  |                                        |               |                              |
|-------------------------------------------------------------------------------------|---------------------------------------------------------------|---------------------------------------------------------------------------------------------|------------------------------------------------------------------------------------------------------------|----------------------------------------|---------------|------------------------------|
|                                                                                     |                                                               |                                                                                             | Reason                                                                                                     | Participant #                          | Missed Visits | <i>De jure estimand</i>      |
| Discontinue Study, Withdraw Consent                                                 | No data                                                       | MDMA                                                                                        |                                                                                                            |                                        |               |                              |
|                                                                                     |                                                               |                                                                                             | COVID                                                                                                      | 0807 <sup>A</sup><br>1211 <sup>A</sup> | T3, T4        | Included T1, T2              |
|                                                                                     |                                                               |                                                                                             | Perceived early efficacy                                                                                   | 0611 <sup>B</sup>                      | T3, T4        | Included T1, T2              |
|                                                                                     |                                                               |                                                                                             | Did not want to complete CAPS due to triggering ( <i>primary</i> ); AE-depressed mood ( <i>secondary</i> ) | 0213 <sup>B</sup>                      | T3, T4        | Included T1, T2              |
|                                                                                     |                                                               | Placebo                                                                                     |                                                                                                            |                                        |               |                              |
|                                                                                     |                                                               |                                                                                             | SAE- suicidal ideation                                                                                     | 0104 <sup>B</sup>                      | T3, T4        | Included T1, T2              |
|                                                                                     |                                                               |                                                                                             | COVID                                                                                                      | 0707 <sup>A</sup>                      | T3, T4        | Included T1, T2              |
|                                                                                     |                                                               |                                                                                             | Choice                                                                                                     | 0711 <sup>B</sup>                      | T3, T4        | Included T1, T2              |
|                                                                                     |                                                               |                                                                                             | AE- insomnia                                                                                               | 0211                                   | T4            | Included T1, T2, T3          |
|                                                                                     |                                                               | Discontinue Intervention (or experiences long delay) and does not receive Rescue Medication | Data collection continues whenever possible via remote visits                                              | MDMA                                   | None Observed |                              |
| Placebo                                                                             |                                                               |                                                                                             |                                                                                                            |                                        |               |                              |
|                                                                                     |                                                               |                                                                                             | Reason                                                                                                     | Participant #                          | Missed Visits | <i>De jure estimand</i>      |
|                                                                                     |                                                               |                                                                                             | COVID <sup>A</sup>                                                                                         | 1502 <sup>A</sup>                      | None          | Included T1, T2, T3          |
| Discontinue Intervention (or experiences long delay) and receives Rescue Medication | Data collection continues whenever possible via remote visits | MDMA                                                                                        | None Observed                                                                                              |                                        |               |                              |
|                                                                                     |                                                               | Placebo                                                                                     |                                                                                                            |                                        |               |                              |
|                                                                                     |                                                               |                                                                                             | Reason                                                                                                     | Participant #                          | Missed Visits | <i>De jure estimand</i>      |
|                                                                                     |                                                               |                                                                                             | SAE- suicide attempt                                                                                       | 0203                                   | T3            | Included T1, T2              |
|                                                                                     |                                                               |                                                                                             | AE- increased anxiety                                                                                      | 0102                                   | T2, T3        | <i>Excluded</i> <sup>C</sup> |
| Death                                                                               | No data                                                       | MDMA                                                                                        | None Observed                                                                                              |                                        |               |                              |
|                                                                                     |                                                               | Placebo                                                                                     | None Observed                                                                                              |                                        |               |                              |
| Suicide                                                                             | No data                                                       | MDMA                                                                                        | None Observed                                                                                              |                                        |               |                              |
|                                                                                     |                                                               | Placebo                                                                                     | None Observed                                                                                              |                                        |               |                              |

<sup>A</sup> COVID, participants for which participation was terminated due to study closure related to the COVID-19 pandemic

<sup>B</sup> Discontinued participation and withdrew consent which led to missing data.

<sup>C</sup> Participant completed only Baseline T1, discontinue intervention and received rescue medication, and T4. As no endpoint assessment was collected prior to treatment discontinuation, this participant is excluded from the *de jure* estimand but included in the *de facto* estimand sensitivity analysis.

**Supplementary Data Table 2. Analysis Effects on Primary Results**

| <b>MMRM Results for Fixed Effects</b>                   |                                |                                     |
|---------------------------------------------------------|--------------------------------|-------------------------------------|
| <b>Effect</b>                                           | <b>F-Value</b>                 | <b>Pr &gt; F</b>                    |
| Treatment                                               | 12.6                           | 0.0007                              |
| Baseline CAPS-5 Score                                   | 0.13                           | 0.7219                              |
| Study Visit                                             | 51.54                          | <.0001                              |
| Treatment x Study Visit                                 | 8.75                           | 0.0004                              |
| Dissociative Subtype                                    | 2.03                           | 0.159                               |
| Study Site                                              | 1.6                            | 0.1003                              |
| <b>Analysis of Covariate Effects on Primary Results</b> |                                |                                     |
| <b>Variable</b>                                         | <b>p-value<br/>main effect</b> | <b>p-value<br/>interaction w/Tx</b> |
| Age (continuous)                                        | 0.2491                         | 0.8291                              |
| Sex biological                                          | 0.6281                         | 0.9376                              |
| Disabled (yes/no)                                       | 0.9883                         | 0.4444                              |
| Covid-19 (pre/during)                                   | 0.7701                         | 0.9633                              |
| Prior SSRI Usage (yes/no)                               | 0.6114                         | 0.7650                              |
| PTSD Duration (continuous)                              | 0.6688                         | 0.3795                              |
| Dissociative Subtype (yes/no)                           | 0.0350                         | 0.0044                              |
| BDI ( $\geq 23$ )                                       | 0.1003                         | 0.6373                              |
| ACE ( $\geq 4$ )                                        | 0.5198                         | 0.5127                              |
| AUDIT ( $\geq 5$ )                                      | 0.4975                         | 0.4071                              |
| DUDIT ( $\geq 5$ )                                      | 0.6420                         | 0.6441                              |

**Supplementary Data Table 2:** Each of these covariates were added one-at-a-time as fixed effects to the primary efficacy model and analyzed as 2-sided F-tests without correction for multiple comparisons. The p-values associated with their coefficient estimates are reported.

**Supplementary Data Table 3: Treatment Emergent Adverse Events Related to MDMA**

| Adverse Event (PT)                | MDMA-assisted therapy (n=46) | Placebo with therapy (n=44) |
|-----------------------------------|------------------------------|-----------------------------|
| Muscle Tightness                  | 29 (63.0%)                   | 5 (11.4%)                   |
| Decreased Appetite                | 24 (52.2%)                   | 5 (11.4%)                   |
| Nausea                            | 14 (30.4%)                   | 5 (11.4%)                   |
| Hyperhidrosis                     | 9 (19.6%)                    | 1 (2.3%)                    |
| Feeling Cold                      | 9 (19.6%)                    | 3 (6.8%)                    |
| Restlessness                      | 7 (15.2%)                    | 0                           |
| Mydriasis                         | 7 (15.2%)                    | 0                           |
| Dizziness Postural                | 6 (13.0%)                    | 2 (4.5%)                    |
| Bruxism                           | 6 (13.0%)                    | 1 (2.3%)                    |
| Nystagmus                         | 6 (13.0%)                    | 0                           |
| Blood Pressure Increased          | 5 (10.9%)                    | 0                           |
| Feeling Jittery                   | 5 (10.9%)                    | 0                           |
| Non-Cardiac Chest Pain            | 5 (10.9%)                    | 1 (2.3%)                    |
| Dry Mouth                         | 5 (10.9%)                    | 2 (4.5%)                    |
| Vision Blurred                    | 4 (8.7%)                     | 1 (2.3%)                    |
| Pollakiuria                       | 4 (8.7%)                     | 1 (2.3%)                    |
| Intrusive Thoughts                | 4 (8.7%)                     | 0                           |
| Vomiting                          | 4 (8.7%)                     | 0                           |
| Stress                            | 4 (8.7%)                     | 0                           |
| Musculoskeletal Pain              | 4 (8.7%)                     | 0                           |
| Pyrexia                           | 3 (6.5%)                     | 1 (2.3%)                    |
| Chills                            | 3 (6.5%)                     | 0                           |
| Substance Use ( <i>cannabis</i> ) | 3 (6.5%)                     | 0                           |
| Micturition urgency               | 3 (6.5%)                     | 0                           |
| Muscle Twitching                  | 3 (6.5%)                     | 0                           |
| Somnolence                        | 3 (6.5%)                     | 0                           |
| Nervousness                       | 3 (6.5%)                     | 0                           |

**Supplementary Data Table 3.** Treatment Emergent Adverse Events (TEAEs). AEs that occurred from the first experimental session to study termination based on participant level incidence were termed TEAE. Relationship to MDMA was determined based on relative incidence of TEAEs with at least two-fold difference between MDMA vs. placebo. Listed here are the most common (>5% of subjects) TEAEs related to MDMA.

**Supplementary Data Table 4: Changes in Vital Signs During the Experimental Sessions**

|                                         | <b>MDMA<br/>(n = 46)</b> | <b>Placebo<br/>(n=44)</b> | <b>Total<br/>(n=90)</b> |
|-----------------------------------------|--------------------------|---------------------------|-------------------------|
| <b>Experimental Session 1</b>           |                          |                           |                         |
| Predose (n)                             | 46                       | 44                        | 90                      |
| Systolic, mean (SD)                     | 126.4 (18.55)            | 120.2 (13.92)             | 123.4 (16.65)           |
| Diastolic, mean (SD)                    | 79.4 (11.23)             | 79.6 (8.76)               | 79.5 (10.04)            |
| Pulse (beats per minute), mean (SD)     | 71.0 (11.16)             | 73.2 (11.20)              | 72.0 (11.17)            |
| Body temperature (degrees C), mean (SD) | 36.6 (0.49)              | 36.6 (0.39)               | 36.6 (0.44)             |
| Interim (n)                             | 46                       | 44                        | 90                      |
| Systolic, mean (SD)                     | 139.1 (19.70)            | 122.3 (14.95)             | 130.9 (19.37)           |
| Diastolic, mean (SD)                    | 85.3 (10.41)             | 79.1 (11.38)              | 82.3 (11.28)            |
| Pulse (beats per minute), mean (SD)     | 82.3 (14.49)             | 69.6 (11.57)              | 76.1 (14.56)            |
| Body temperature (degrees C), mean (SD) | 36.9 (0.42)              | 36.7 (0.36)               | 36.8 (0.40)             |
| Endpoint (n)                            | 46                       | 44                        | 90                      |
| Systolic, mean (SD)                     | 130.8 (16.63)            | 119.2 (14.77)             | 125.1 (16.71)           |
| Diastolic, mean (SD)                    | 81.7 (9.63)              | 77.2 (11.17)              | 79.5 (10.60)            |
| Pulse (beats per minute), mean (SD)     | 79.4 (12.51)             | 73.7 (10.13)              | 76.6 (11.70)            |
| Body temperature (degrees C), mean (SD) | 36.8 (0.51)              | 36.9 (0.30)               | 36.8 (0.42)             |
| <b>Experimental Session 2</b>           |                          |                           |                         |
| Predose (n)                             | 43                       | 41                        | 84                      |
| Systolic, mean (SD)                     | 127.2 (14.46)            | 117.0 (15.33)             | 122.2 (15.67)           |
| Diastolic, mean (SD)                    | 81.1 (10.35)             | 76.8 (9.52)               | 79.0 (10.13)            |
| Pulse (beats per minute), mean (SD)     | 71.7 (10.44)             | 67.1 (10.28)              | 69.5 (10.55)            |
| Body temperature (degrees C), mean (SD) | 36.58 (0.44)             | 36.5 (0.41)               | 36.6 (0.42)             |
| Interim (n)                             | 43                       | 41                        | 84                      |
| Systolic, mean (SD)                     | 146.5 (15.09)            | 118.1 (18.14)             | 132.7 (21.85)           |
| Diastolic, mean (SD)                    | 89.1 (10.39)             | 76.4 (12.45)              | 82.9 (13.02)            |
| Pulse (beats per minute), mean (SD)     | 87.3 (12.80)             | 66.1 (10.61)              | 77.0 (15.84)            |
| Body temperature (degrees C), mean (SD) | 36.9 (0.46)              | 36.7 (0.30)               | 36.8 (0.40)             |
| Endpoint (n)                            | 43                       | 41                        | 84                      |
| Systolic, mean (SD)                     | 128.8 (17.66)            | 118.9 (15.12)             | 123.9 (17.11)           |
| Diastolic, mean (SD)                    | 81.5 (12.36)             | 75.2 (9.02)               | 78.4 (11.25)            |
| Pulse (beats per minute), mean (SD)     | 85.3 (14.66)             | 69.8 (8.75)               | 77.7 (14.35)            |
| Body temperature (degrees C), mean (SD) | 36.9 (0.48)              | 36.7 (0.29)               | 36.8 (0.41)             |
| <b>Experimental Session 3</b>           |                          |                           |                         |
| Predose (n)                             | 42                       | 37                        | 79                      |
| Systolic, mean (SD)                     | 128.5 (15.30)            | 118.0 (15.79)             | 123.6 (16.31)           |
| Diastolic, mean (SD)                    | 82.4 (8.00)              | 76.1 (10.98)              | 79.4 (9.96)             |
| Pulse (beats per minute), mean (SD)     | 72.7 (11.80)             | 69.4 (11.49)              | 71.2 (11.70)            |
| Body temperature (degrees C), mean (SD) | 36.6 (0.46)              | 36.5585 (0.50)            | 36.5850 (0.47)          |
| Interim (n)                             | 41                       | 37                        | 78                      |
| Systolic, mean (SD)                     | 145.9 (19.23)            | 117.9 (15.74)             | 132.6 (22.51)           |
| Diastolic, mean (SD)                    | 86.8 (10.32)             | 76.2 (10.07)              | 81.7 (11.45)            |
| Pulse (beats per minute), mean (SD)     | 91.6 (16.95)             | 66.4 (12.99)              | 79.8 (19.75)            |
| Body temperature (degrees C), mean (SD) | 37.0 (0.47)              | 36.7 (0.325)              | 36.8 (0.44)             |
| Endpoint (n)                            | 42                       | 37                        | 79                      |
| Systolic, mean (SD)                     | 127.6 (16.62)            | 117.5 (13.74)             | 122.9 (16.06)           |
| Diastolic, mean (SD)                    | 78.4 (11.15)             | 74.0 (9.39)               | 76.3 (10.53)            |
| Pulse (beats per minute), mean (SD)     | 82.1 (14.95)             | 71.6 (11.84)              | 77.2 (14.49)            |
| Body temperature (degrees C), mean (SD) | 36.9 (0.50)              | 36.8 (0.40)               | 36.8 (0.45)             |

**Supplementary Data Table 4.** Changes in vital signs during the experimental sessions. Transient increases in blood pressure were observed in the MDMA group, as expected based on Phase 2 data and studies in healthy volunteers.
